# Supplementary material
Source: PubMed Central journal article supplement (PMC3138280)
Supplement: supp_M111.254029_jbc.M111.254029-1.pdf [file supp_M111.254029_jbc.M111.254029-1.pdf]

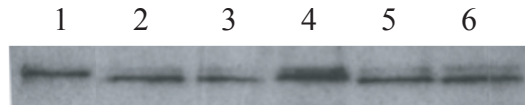

Supplemental Fig. 1 Immuno blot analysis of flagellin from several mutant strain of *A. avenae*. Lane 1: wild type K1 flagellin; lane 2: <sup>178</sup>Ser/Ala K1 flagellin; lane 3: <sup>183</sup>Ser/Ala K1 flagellin; lane 4: <sup>186</sup>Ser/Ala K1 flagellin; lane 5: <sup>212</sup>Ser/Ala K1 flagellin; lane 6: <sup>351</sup>Thr/Ala K1 flagellin

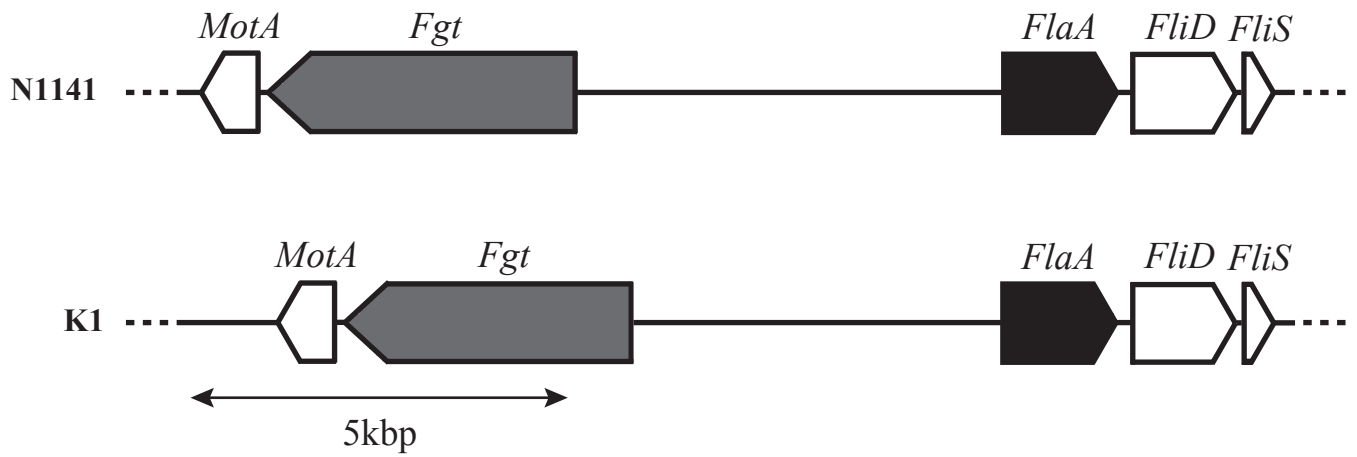

Supplemental Fig. 2 Schematic representation of the gene structure in the vicinity of *FlaA* gene. The predicted glycosyltransferase genes (*Fgt*) are indicated by gray pentagons, and the flagellin genes (*FlaA*) are indicated by black pentagons.

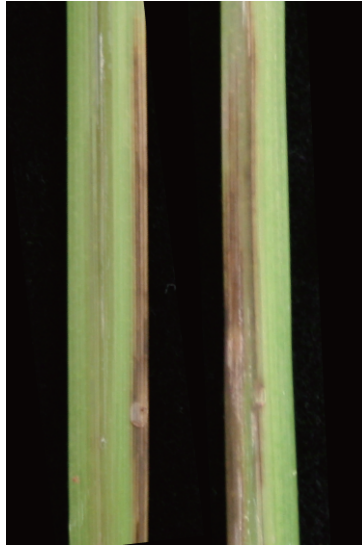

Supplemental Fig. 3 Disease symptom in rice sheath inoculated with the K1 wild-type (left) and  $K\Delta Fgt$  strains (right).
